# Supplementary material for: A Microfluidic Device for Temporally Controlled Gene Expression and Long-Term Fluorescent Imaging in Unperturbed Dividing Yeast Cells
Source: PLOS journal article supplement (doi:10.1371/journal.pone.0001468), 2008-01-22

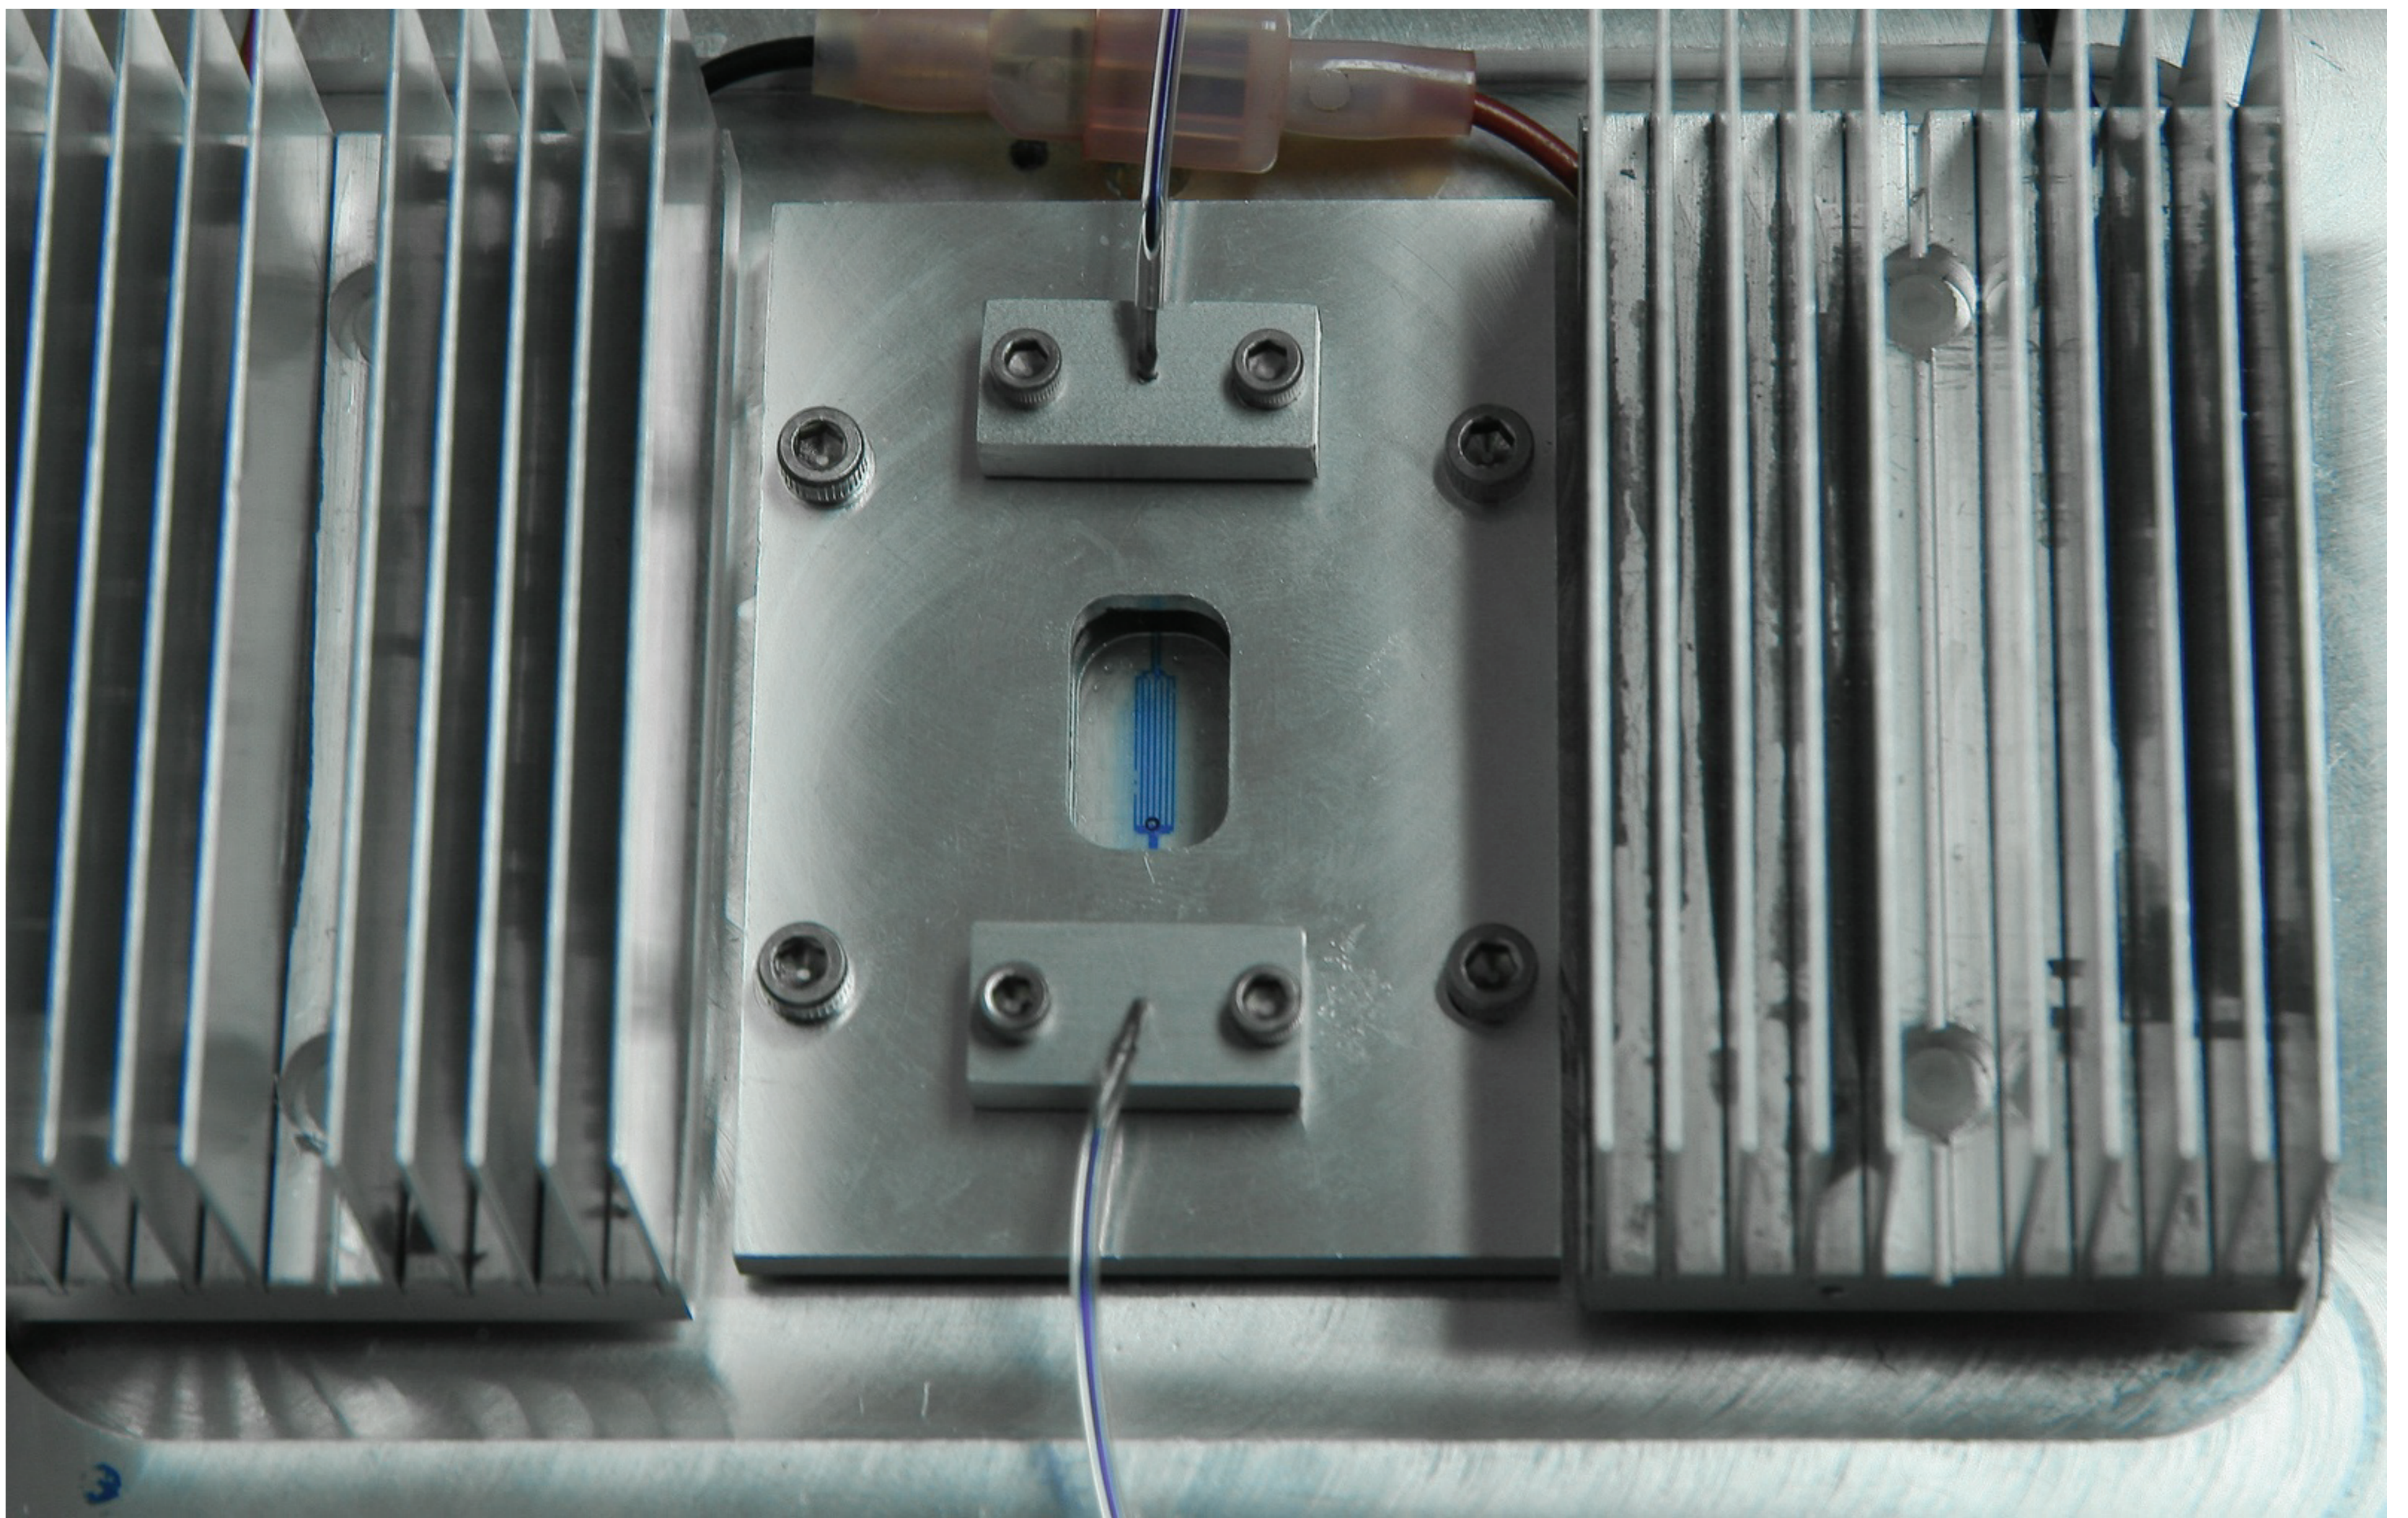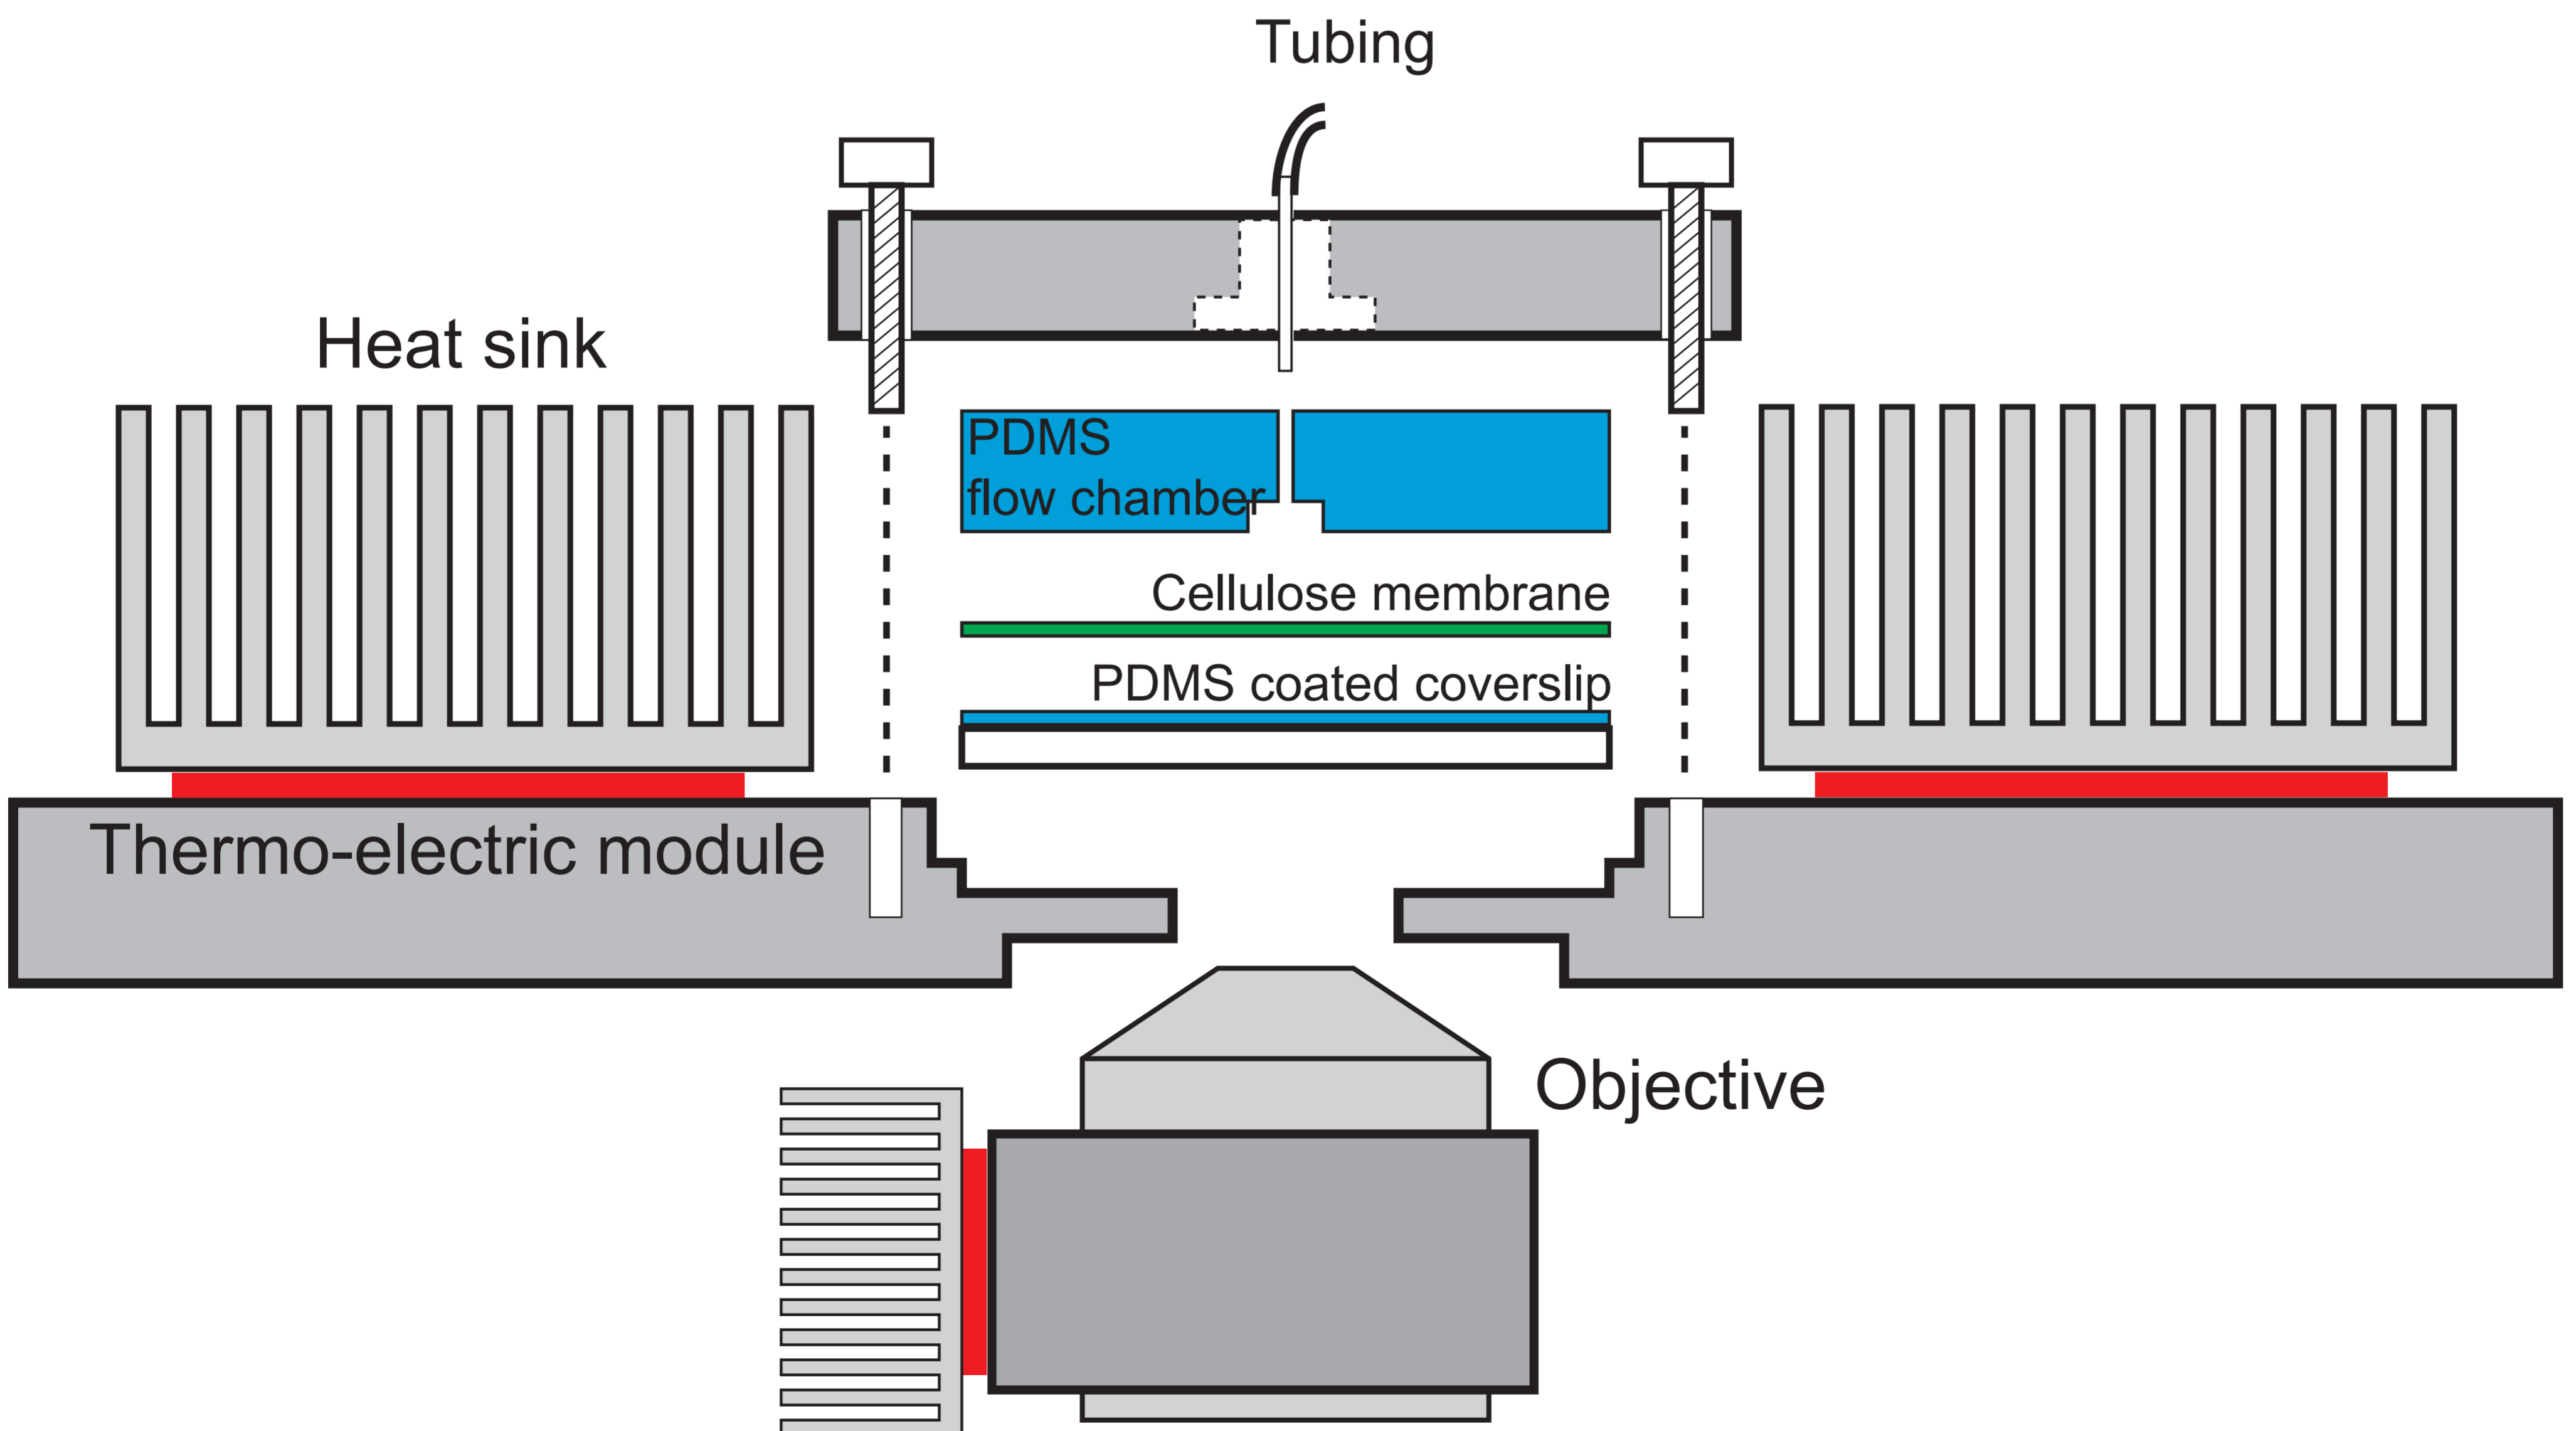

Supplement: S2 (10.1371/journal.pone.0001468.s002) [file journal.pone.0001468.s002]
