# Supplementary material for: A Microfluidic Device for Temporally Controlled Gene Expression and Long-Term Fluorescent Imaging in Unperturbed Dividing Yeast Cells
Source: PLoS One. 2008 Jan 23;3(1):e1468. doi: 10.1371/journal.pone.0001468 (PMC2194624; doi:10.1371/journal.pone.0001468)
Supplement: Table S1 — Timings of cell cycle events in triggering experimentsexperiments. WT Mother and Daughter represent control (0.03 MB PDF) [file pone.0001468.s006.pdf]

| Experiment      | From                       | To                         | Mean (min)      | COV  |
|-----------------|----------------------------|----------------------------|-----------------|------|
| WT Mother       | Division ( $t_0$ )         | <i>WHI5</i> exit ( $t_1$ ) | $1.15 \pm 0.19$ | 2.26 |
| WT Mother       | <i>WHI5</i> exit ( $t_1$ ) | Budding ( $t_2$ )          | $12.0 \pm 0.4$  | 0.48 |
| WT Mother       | Division ( $t_0$ )         | Budding ( $t_2$ )          | $13.2 \pm 0.4$  | 0.46 |
| WT Mother       | Division ( $t_0$ )         | Division ( $t_3$ )         | $72.8 \pm 1.0$  | 0.14 |
| WT Daughter     | Division ( $t_0$ )         | <i>WHI5</i> exit ( $t_1$ ) | $11.1 \pm 1.0$  | 1.2  |
| WT Daughter     | <i>WHI5</i> exit ( $t_1$ ) | Budding ( $t_2$ )          | $11.8 \pm 0.5$  | 0.5  |
| WT Daughter     | Division ( $t_0$ )         | Budding ( $t_2$ )          | $22.9 \pm 1.0$  | 0.6  |
| WT Daughter     | Division ( $t_2$ )         | Division ( $t_3$ )         | $82.7 \pm 1.6$  | 0.2  |
| G1/S trigger    | Trigger ( $t_0$ )          | <i>WHI5</i> exit ( $t_1$ ) | $17.8 \pm 2.5$  | 0.2  |
| G1/S trigger    | <i>WHI5</i> exit ( $t_1$ ) | Budding ( $t_2$ )          | $8.3 \pm 0.4$   | 0.37 |
| G1/S trigger    | Trigger ( $t_0$ )          | Budding ( $t_2$ )          | $26.6 \pm 0.7$  | 0.19 |
| G1/S trigger    | Trigger ( $t_0$ )          | Division ( $t_3$ )         | $94.8 \pm 2.5$  | 0.18 |
| Mitotic trigger | Trigger ( $t_0$ )          | Anaphase ( $t_1$ )         | $15.3 \pm 0.42$ | 0.2  |
| Mitotic trigger | Anaphase ( $t_1$ )         | Division ( $t_2$ )         | $9.6 \pm 0.58$  | 0.44 |
| Mitotic trigger | Trigger ( $t_0$ )          | Division ( $t_2$ )         | $22.5 \pm 0.44$ | 0.15 |
| Mitotic trigger | Trigger ( $t_2$ )          | Budding ( $t_3$ )          | $15.5 \pm 0.78$ | 0.39 |
| Mitotic trigger | Trigger ( $t_0$ )          | Budding ( $t_3$ )          | $38.0 \pm 0.83$ | 0.17 |

Table 1: Timings of cell cycle events in triggering experiments. WT Mother and Daughter represent control experiments
